# Supplementary material for: Does Constitutive Expression of Defense-Related Genes and Salicylic Acid Concentrations Correlate with Field Resistance of Potato to Black Scurf Disease?
Source: MDPI journal article supplement (doi:10.3390/bioengineering10111244), 2023-10-24
Supplement: s1 [file s1]

**Table S1.** Oligonucleotide primer sets.

| Gene        | Function                        | Forward primer           | Reverse primer          | Accession    | Reference  |
|-------------|---------------------------------|--------------------------|-------------------------|--------------|------------|
| <i>PR1</i>  | Pathogenesis-related 1          | GGTGCAGGAGAGAACCTT       | GGTACCATAGTTGTAGTTTGGCT | AJ250136     | [1]        |
| <i>PR2</i>  | 1,3-β-Glucan glucanohydrolase   | CACATTGCTTCTGGGATGGA     | AACATCTGGCCAGAAATCTTTAA | AF067863     | [2]        |
| <i>PR3</i>  | Acidic endochitinase            | ATGGCTGCCTTTTTCGGTCA     | TACCTTGTCCAGCTCGTTCG    | NM_001318545 | [1]        |
| <i>PR6</i>  | Proteinase inhibitor II         | TGCCCACGTTTCAAGGAAG      | TGGGTCAGATTCTCCTTCGC    | KX710107     | [1]        |
| <i>PR10</i> | Pathogenesis-related STH-2-like | TGATGTTAAGAGCATTGAGGTTGT | ATTGGACCACCTTCAACAAAGTT | XM_006340827 | [1]        |
| <i>PAL</i>  | Phenylalanine ammonia-lyase     | TCGAGGACGAATTGAAGGCAA    | GCACATTGCTGTGAACACCTT   | MH636300     | [1]        |
| <i>ICS</i>  | Isochorismate synthase          | CTTCTCCGGTCTGAAGAGTTG    | TGAAAAGGGGCGTAAATGAG    | XM_015312034 | this study |
| <i>ACT</i>  | Reference gene actin            | GCTTCCCGATGGTCAAGTCA     | GGATTCCAGCTGCTTCCATTC   | X55749       | [1]        |

## References

1. Genzel, F.; Franken, P.; Witzel, K.; Grosch, R. Systemic induction of salicylic acid-related plant defences in potato in response to *Rhizoctonia solani* AG3PT. *Plant Pathology* **2018**, *67*, 337-348, doi:<https://doi.org/10.1111/ppa.12746>.
2. Lehtonen, M.J.; Somervuo, P.; Valkonen, J.P.T. Infection with *Rhizoctonia solani* induces defense genes and systemic resistance in potato sprouts grown without light. *Phytopathology* **2008**, *98*, 1190-1198, doi:<https://doi.org/10.1094/phyto-98-11-1190>.
